19. Cook TM, Woodall N, Frerk C; Fourth National Audit Project: Major complications of airway management in the UK: Results of the Fourth National Audit Project of the Royal College of Anaesthetists and the Difficult

Airway Society. Part 1: Anaesthesia. Br J Anaesth 2011; 106:617–31

20. Asai T: Editorial II: Who is at increased risk of pulmonary aspiration? Br J Anaesth 2004; 93:497–500

**ANESTHESIOLOGY REFLECTIONS FROM THE WOOD LIBRARY-MUSEUM**

ASA's Inaugural Distinguished Service Award Recipient:  
Paul M. Wood, M.D.

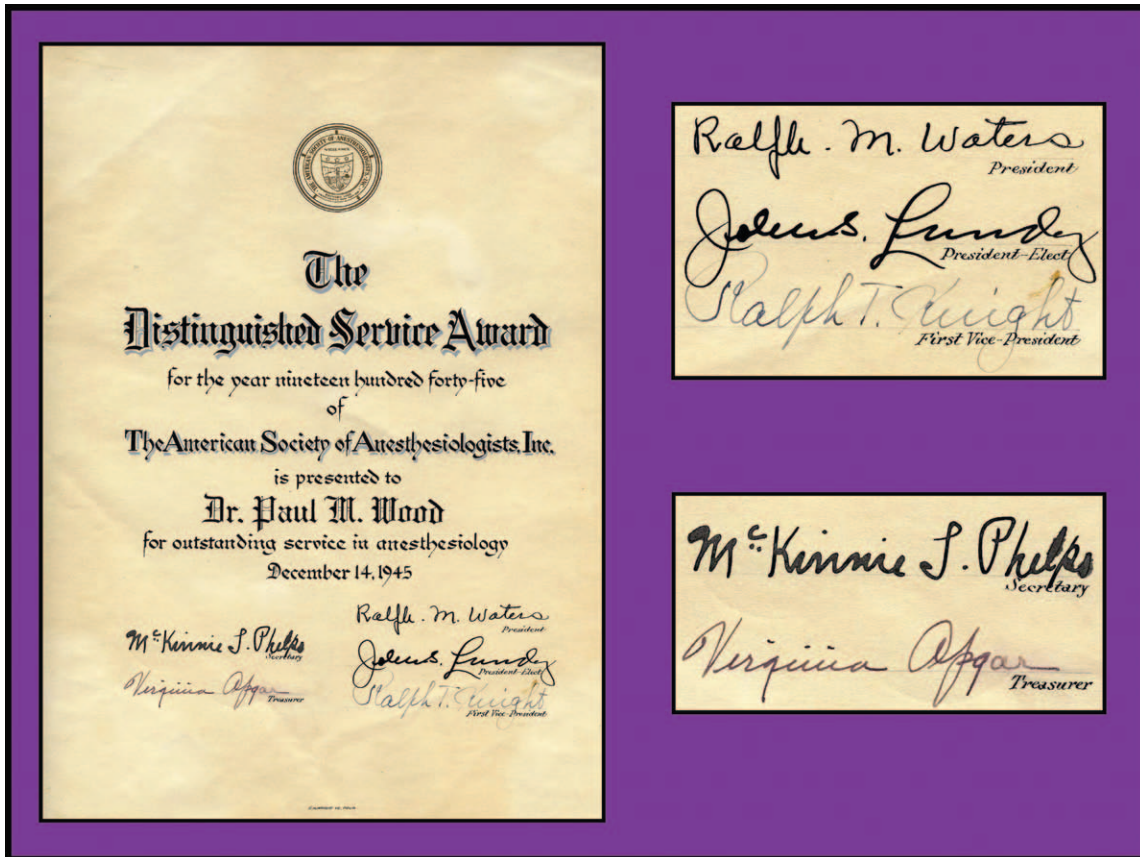

In New York City during World War II, Dr. Paul Meyer Wood (1894–1963) managed to practice clinical anesthesia from 5 to 11 AM and then spend the balance of his day on the affairs of the American Society of Anesthetists, its journal ANESTHESIOLOGY, its “library-museum,” and the newly formed American Board of Anesthesiology. On December 14, 1945, Dr. Wood was presented with the inaugural Distinguished Service Award (“D.S.A.”, left) of his grateful Society, which he had just helped rename as the “American Society of Anesthesiologists.” Signing Wood’s D.S.A. (close-up, right) were President Ralph M. Waters, President-Elect John S. Lundy, First Vice-President Ralph T. Knight, Secretary McKinnie S. Phelps, and Treasurer Virginia Apgar. (Copyright © the American Society of Anesthesiologists, Inc.)

George S. Bause, M.D., M.P.H., Honorary Curator, ASA’s Wood Library-Museum of Anesthesiology, Park Ridge, Illinois, and Clinical Associate Professor, Case Western Reserve University, Cleveland, Ohio. UJYC@aol.com.
